# Supplementary material for: Performance of the G4 Xpert® MTB/RIF assay for the detection of Mycobacterium tuberculosis and rifampin resistance: a retrospective case-control study of analytical and clinical samples from high- and low-tuberculosis prevalence settings
Source: Springer Nature journal article supplement (doi:10.1186/s12879-016-2039-4), 2016-12-01
Supplement: MOESM1 [file 11945338]

1 **Supplemental Materials**

2

3 **Methods**

4 *Study design and specimen inclusion criteria – Clinical studies*

5 *Clinical study 1 (CS1)*

6 CS1 consisted of four collections. Collection one samples included 176 culture-positive  
7 and -negative unprocessed sputum samples from Lima, Peru. These samples were obtained from  
8 subjects enrolled at the Tropical Medicine Institute Alexander von Humboldt, Universidad  
9 Peruana Cayetano Heredia from November 2010 to January 2011. Collection two samples  
10 included 400 culture-positive unprocessed sputum samples from Cape Town, South Africa.  
11 Collection two samples were obtained from subjects enrolled by the Institute for Infectious  
12 Diseases and Molecular Medicine, University of Cape Town in South Africa from November  
13 2010 to January 2011. These samples were excluded due to insufficient volume. Collection three  
14 samples included 400 partially processed (see below) and archived culture-positive specimens  
15 prospectively collected from HIV-negative adults in Vietnam, South Africa and Bangladesh.  
16 These were obtained from subjects enrolled by the Pham Ngoc Thach Hospital in Vietnam from  
17 April 2007 to April 2009, the South African Medical Research Council in South Africa from  
18 May 2009 to May 2010, and the International Centre for Diarrheal Disease Research in  
19 Bangladesh from May 2006 to May 2007. Collection four samples included 50 partially  
20 processed (see below) MTB culture-negative sputum specimens obtained from HIV-negative  
21 adults from South Africa and Vietnam. Collection 4 specimens were tested among Collection 3  
22 specimens to provide a control group and minimize the risk of bias in testing known populations  
23 of positive specimens. Two sputum samples were collected from each study participant; the  
24 specimen provided for Xpert testing was based on sufficient volume available.

25 Symptoms suggesting pulmonary TB were defined as: persistent cough generally  $\geq 2$   
26 weeks and at least one other symptom suggestive of TB such as fever, malaise, recent weight  
27 loss, night sweats, contact with an active TB case, hemoptysis, chest pain, loss of appetite.

28 Samples in Collection three and four were partially processed prior to Xpert testing by  
29 homogenizing for one minute with a vortexer and glass beads and split into 500  $\mu\text{L}$  aliquots.  
30 Aliquots underwent microbiologic testing for MTB and were frozen at  $-70^{\circ}\text{C}$  until shipment on  
31 dry ice to NJMS for testing by Xpert. Although partially processed, these specimens were treated  
32 in the Xpert as if they were raw sputa.

33

#### 34 *Clinical Study 2 (CS2)*

35 Up to 3 specimens were collected from each patient for MTB diagnosis. Subjects with at  
36 least one culture positive specimen were consecutively selected for Xpert testing using the first  
37 specimen with sufficient volume. MTB negative specimens were selected by choosing the first  
38 available study participant with all MTB negative baseline cultures that were collected after an  
39 eligible MTB positive case. An additional 25 MTB negative cases were randomly selected and  
40 included for testing throughout the study.

41

#### 42 *Clinical Studies 3(CS3) and 4 (CS4)*

43 These studies are described in the main paper.

44

#### 45 *Sample inclusion criteria*

46 Criteria for inclusion of samples in this analysis from CS1 included: 1) subject was not  
47 on TB treatment at the time of collection; 2) sufficient sample volume was available for Xpert

48 testing; and 3) results from AFB smear, culture, MTB identification and phenotypic DST results  
49 (if MTB culture positive) were available; for specimens with no DST results, an additional  
50 sputum sample was tested for DST if available. Criteria for inclusion of samples from CS2, CS3  
51 and CS4 included: 1) subject was newly suspected to have pulmonary TB (at least 6 months from  
52 the last diagnosis of TB); 2) sufficient sample volume was available for Xpert testing; and 3)  
53 AFB smear, MTB culture and DST results (if MTB culture positive) were available.

54

#### 55 ***Laboratory testing - Analytic study***

56 The culture isolates were spiked at known concentrations of colony forming units  
57 (CFU)/mL into aliquots of a pool of sputa known to be negative for MTB and for nontuberculous  
58 Mycobacterium. Forty percent of the isolates were spiked at low concentrations near the assay  
59 cutoff (1500 CFU/mL), 30% at moderate concentrations (15,000 CFU/mL) and 30% at high  
60 concentrations (150,000 CFU/mL).

61

#### 62 ***Statistical Analysis***

63 Results for detection of MTBc and RIF resistance were defined as: 1) true positives (TP)  
64 if they were positive by Xpert and positive by culture/DST; 2) false positives (FP) if they were  
65 positive by Xpert and negative by culture/DST; 3) false negatives (FN) if they were negative by  
66 Xpert and positive by culture/DST; and 4) true negatives (TN) if they were negative by Xpert  
67 and negative by culture/DST. Sensitivity was defined as  $TP/(TP+FN)$  and specificity as  
68  $TN/(TN+FP)$ .

69 | [Sample size for MTB detection using the Xpert MTB/RIF Assay relative to Culture.](#)

70 | [Sample Size Analysis for Sensitivity for MTB Detection](#)

71 H<sub>0</sub>: Sensitivity = 95% (relative to culture procedure in protocol)

72 H<sub>A</sub>: Sensitivity < 90% (relative to culture procedure in protocol)

73 With power > 90% to reject the Null if Alternate is True

74 Minimal Sample Size = 400, Critical Value ≤ 27 FN (or lower 95% 2-sided CI ≥ 90 if SS > 400)

75 The actual probability calculations are as follows:

76 Equation-1 
$$P(FN \leq 27 | Null) = \sum_{d=0}^{27} \binom{400}{d} 0.95^{400-d} 0.05^d = 95.2\%$$

77 Which is the probability of passing given the Null Hypothesis is true.

78 Equation-2

79 
$$1 - P(FN \leq 27 | Alternate) = 1 - \sum_{d=0}^{27} \binom{400}{d} 0.90^{400-d} 0.10^d = 98.5\% = Power$$

80

81 Sample Size Analysis for Specificity for MTB Detection

82 H<sub>0</sub>: Specificity = 98% (relative to culture procedure in protocol)

83 H<sub>A</sub>: Specificity < 95% (relative to culture procedure in protocol)

84 With power > 95% to reject the Null if Alternate is True

85 Minimal Sample Size = 500, Critical Value ≤ 15 FP (or lower 95% 2-sided CI ≥ 95 if SS > 500)

86 The actual probability calculations are as follows:

87 Equation-3 
$$P(FN \leq 15 | Null) = \sum_{d=0}^{15} \binom{500}{d} 0.98^{500-d} 0.02^d = 95.3\%$$

88 Which is the probability of passing given the Null Hypothesis is true.

89 Equation-4

90 
$$1 - P(FN \leq 15 | Alternate) = 1 - \sum_{d=0}^{15} \binom{500}{d} 0.95^{500-d} 0.05^d = 98.0\% = Power$$

91

92 Sample Size

93 The sample size required for the sensitivity and specificity analyses is 400 MTB culture positive  
94 and 500 MTB culture negative specimens, respectively. Our study included 468 MTB culture  
95 positive specimens and 628 MTB culture negative specimens. Thus, the sample size requirement  
96 was met for both sensitivity and specificity for the detection of MTB using the Xpert MTB/RIF

97 Assay.

98 Sample size for detection of RIF resistance.

99 Achieving sample size for rifampin resistance was not expected because of the  
100 infrequency of rifampin resistance among clinical isolates. Therefore, we conducted the analytic  
101 study by testing spiked samples.

102

103 **Results**

104 *CSI results*

105 Among the 531 samples included in the analysis, 366 were culture positive and 165 were  
106 culture negative. Overall, Xpert detected 345 of 366 culture positive specimens for a sensitivity  
107 of 94.3% (95% CI: 91.4-96.2%). Xpert detected MTB in 270 of 271 smear positive, culture  
108 positive cases for a sensitivity of 99.6% (95% CI: 97.9-99.9%) and 75 of 95 smear negative,  
109 culture positive cases for a sensitivity of 78.9% (95% CI: 69.7%-85.9%). Overall, Xpert did not  
110 detect MTB in 161 of 165 culture negative specimens, for a specificity of 97.6% (95% CI:  
111 93.9%-99.1%).

112 Among the 17 samples with RIF resistance on DST, one sample was Xpert MTB  
113 negative. Xpert detected RIF resistance in 15 of 16 samples for a sensitivity of 93.8% (95% CI

114 71.7-98.9). Xpert did not detect RIF resistance in 314 of 322 specimens that were negative by  
115 DST for a specificity of 97.5% (95% CI 95.2-98.7). Bi-directional sequencing was performed on  
116 all culture positive isolates with discrepant results. There were 21 MTB culture positive  
117 specimens that were MTB not detected by Xpert; sequencing confirmed all to be MTB positive.  
118 There were nine samples with discordant RIF resistance results; sequencing confirmed results of  
119 the Xpert Assay in 3 of the 9 discordant specimens (Table 1).

120

### 121 *Poolability Analysis*

122 The four clinical studies were tested for homogeneity by analyzing the results across  
123 multiple parameters using the Fisher's Exact Test. A critical p-value was set to 0.01 due to  
124 multiple testing in several categories (Bonferroni principle). No differences were identified  
125 across the following parameters ( $p > 0.01$ ): protocol, archived or fresh samples, processed or  
126 unprocessed samples, gender, age group and site (data not shown). Some difference was found  
127 for sensitivity across site ( $p = 0.08$ ), specificity across site ( $p = 0.06$ ) and specificity across US vs.  
128 non-US samples ( $p = 0.04$ ) but these differences did not meet the cutoff for significance.  
129 Sensitivity was different across sample collection method (induced vs. expectorated,  $p = .0029$ ).  
130 However, it was felt that the small number of induced samples relative to expectorated and the  
131 relative large percentage of false negatives in the induced samples yielded the small p-value.  
132 Forty percent (10/25) of the MTB positive culture induced specimens were AFB smear negative.  
133 Of these ten specimens, six were false negative by Xpert MTB/RIF Assay. The sensitivity may  
134 therefore have been lower in induced specimens due to the large percentage of AFB smear  
135 negative specimens in this population and the potential dilutional effect of the induction

136 process[1]. The studies were therefore determined to be poolable and the results of testing from  
137 all four clinical studies were combined and are presented together.

138 **References**

- 139 1. Theron G, Peter J, Calligaro G, Meldau R, Hanrahan C, Khalfey H, Matinyenya B,  
140 Muchinga T, Smith L, Pandie S *et al*: **Determinants of PCR performance (Xpert**  
141 **MTB/RIF), including bacterial load and inhibition, for TB diagnosis using**  
142 **specimens from different body compartments.** *Scientific reports* 2014, **4**:5658.



143 **Table 1: Clinical Study 1 – discrepant Xpert assay and culture results confirmed by**  
 144 **sequencing**

| <b>Culture/DST<br/>Result</b>    | <b>Xpert MTB/RIF<br/>Assay Result</b>         | <b>n</b> | <b>Bi-directional<br/>sequencing</b>           |
|----------------------------------|-----------------------------------------------|----------|------------------------------------------------|
| MTB positive/RIF-<br>resistant   | MTB NOT DETECTED                              | 1        | 1 of 1 RIF resistant                           |
| MTB positive/RIF-<br>susceptible | MTB NOT DETECTED                              | 19       | 19 of 19 RIF susceptible                       |
| MTB positive/DST<br>not done     | MTB NOT DETECTED                              | 1        | 1 of 1 RIF susceptible                         |
| MTB positive/RIF-<br>resistant   | MTB DETECTED; Rif<br>Resistance NOT DETECTED  | 1        | 1 of 1 RIF resistant                           |
| MTB positive/RIF-<br>susceptible | MTB DETECTED; Rif<br>Resistance INDETERMINATE | 4        | 4 of 4 RIF susceptible                         |
| MTB positive/RIF-<br>susceptible | MTB DETECTED; Rif<br>Resistance DETECTED      | 4        | 3 of 4 RIF resistant<br>1 of 4 RIF susceptible |

145
